# Supplementary material
Source: Research Square preprint supplement (doi:10.21203/rs.3.rs-9213148/v1)
Supplement: Supplementary file 1 [file f39d7ffe40398cee4d76904e.docx]

**Supplementary Material**

**Supplement to: The National Sarcopenia Atlas of China: Geospatial Patterns and Region-Specific Cardiorenal Risks Among Middle-Aged and Older Adults**

**Table of contents and numbered pages**

| **Contents** | **Page** |
| --- | --- |
| **Supplementary Table 1** | 2-5 |
| **Supplementary Table 2** | 6-10 |
| **Supplementary Table 3** | 11-15 |
| **Supplementary Table 4** | 16 |
| **Supplementary Figure 1** | 17 |
| **Supplementary Figure 2** | 18 |
| **Supplementary Figure 3** | 19 |
| **Supplementary Figure 4** | 20 |
| **Supplementary Figure 5** | 21 |

**Supplementary Table 1. Supplementary demographic characteristics of different geographic regions at baseline (wave 2011)**

| **Variable** | **N** | **Overall** N = 12,263a | **Central**  N = 2,162a | **East**  N = 3,874a | **North**  N = 1,417a | **Northeast**  N = 924a | **Northwest**  N = 925a | **South**  N = 702a | **Southwest**  N = 2,259a |
| --- | --- | --- | --- | --- | --- | --- | --- | --- | --- |
| **Education** | 12,263 |  |  |  |  |  |  |  |  |
| *Under upper secondary* |  | 10,982 (89.6%) | 1,912 (88.4%) | 3,516 (90.8%) | 1,172 (82.7%) | 759 (82.1%) | 810 (87.6%) | 629 (89.6%) | 2,184 (96.7%) |
| *Upper secondary* |  | 1,090 (8.9%) | 207 (9.6%) | 293 (7.6%) | 218 (15.4%) | 150 (16.2%) | 87 (9.4%) | 70 (10.0%) | 65 (2.9%) |
| *Tertiary* |  | 191 (1.6%) | 43 (2.0%) | 65 (1.7%) | 27 (1.9%) | 15 (1.6%) | 28 (3.0%) | 3 (0.4%) | 10 (0.4%) |
| **Drinking** | 12,252 |  |  |  |  |  |  |  |  |
| *no drinking last year* |  | 8,166 (66.7%) | 1,456 (67.3%) | 2,477 (64.0%) | 1,014 (71.6%) | 595 (64.4%) | 682 (74.0%) | 501 (71.5%) | 1,441 (64.0%) |
| *drink <1 month last year* |  | 992 (8.1%) | 180 (8.3%) | 292 (7.5%) | 108 (7.6%) | 63 (6.8%) | 120 (13.0%) | 80 (11.4%) | 149 (6.6%) |
| *drink >1 month last year* |  | 3,094 (25.3%) | 526 (24.3%) | 1,104 (28.5%) | 295 (20.8%) | 266 (28.8%) | 120 (13.0%) | 120 (17.1%) | 663 (29.4%) |

**Supplementary Table 1** (*continued*)

| **Variable** | **N** | **Overall** N = 12,263a | **Central**  N = 2,162a | **East**  N = 3,874a | **North**  N = 1,417a | **Northeast**  N = 924a | **Northwest**  N = 925a | **South**  N = 702a | **Southwest**  N = 2,259a |
| --- | --- | --- | --- | --- | --- | --- | --- | --- | --- |
| **Smoking** | 12,252 |  |  |  |  |  |  |  |  |
| *Never* |  | 7,323 (59.8%) | 1,327 (61.4%) | 2,349 (60.7%) | 820 (57.9%) | 501 (54.2%) | 548 (59.4%) | 409 (58.3%) | 1,369 (60.8%) |
| *Former, now quit* |  | 1,084 (8.8%) | 199 (9.2%) | 392 (10.1%) | 138 (9.7%) | 83 (9.0%) | 68 (7.4%) | 53 (7.6%) | 151 (6.7%) |
| *Ever smoke, don't known whether smoke now* |  | 53 (0.4%) | 7 (0.3%) | 15 (0.4%) | 2 (0.1%) | 5 (0.5%) | 7 (0.8%) | 5 (0.7%) | 12 (0.5%) |
| *Still smoke* |  | 3,792 (31.0%) | 629 (29.1%) | 1,117 (28.8%) | 457 (32.3%) | 335 (36.3%) | 299 (32.4%) | 234 (33.4%) | 721 (32.0%) |
| **Physical Inactivity** | 12,263 |  |  |  |  |  |  |  |  |
| *no* |  | 12,095 (98.6%) | 2,131 (98.6%) | 3,827 (98.8%) | 1,395 (98.4%) | 911 (98.6%) | 910 (98.4%) | 696 (99.1%) | 2,225 (98.5%) |
| *yes* |  | 168 (1.4%) | 31 (1.4%) | 47 (1.2%) | 22 (1.6%) | 13 (1.4%) | 15 (1.6%) | 6 (0.9%) | 34 (1.5%) |

**Supplementary Table 1** (*continued*)

| **Variable** | **N** | **Overall** N = 12,263a | **Central**  N = 2,162a | **East**  N = 3,874a | **North**  N = 1,417a | **Northeast**  N = 924a | **Northwest**  N = 925a | **South**  N = 702a | **Southwest**  N = 2,259a |
| --- | --- | --- | --- | --- | --- | --- | --- | --- | --- |
| **Annual income** | 12,263 |  |  |  |  |  |  |  |  |
| *Q1* |  | 2,629 (21.4%) | 152 (7.0%) | 718 (18.5%) | 80 (5.6%) | 51 (5.5%) | 170 (18.4%) | 33 (4.7%) | 1,425 (63.1%) |
| *Q2* |  | 3,113 (25.4%) | 0 (0.0%) | 1,105 (28.5%) | 965 (68.1%) | 34 (3.7%) | 330 (35.7%) | 0 (0.0%) | 679 (30.1%) |
| *Q3* |  | 2,871 (23.4%) | 0 (0.0%) | 991 (25.6%) | 372 (26.3%) | 839 (90.8%) | 0 (0.0%) | 669 (95.3%) | 0 (0.0%) |
| *Q4* |  | 3,650 (29.8%) | 2,010 (93.0%) | 1,060 (27.4%) | 0 (0.0%) | 0 (0.0%) | 425 (45.9%) | 0 (0.0%) | 155 (6.9%) |
| **Residence place** | 12,263 |  |  |  |  |  |  |  |  |
| *rural* |  | 7,828 (63.8%) | 1,403 (64.9%) | 2,488 (64.2%) | 987 (69.7%) | 483 (52.3%) | 658 (71.1%) | 291 (41.5%) | 1,518 (67.2%) |
| *urban* |  | 4,435 (36.2%) | 759 (35.1%) | 1,386 (35.8%) | 430 (30.3%) | 441 (47.7%) | 267 (28.9%) | 411 (58.5%) | 741 (32.8%) |

**Supplementary Table 1** (*continued*)

| **Variable** | **N** | **Overall** N = 12,263a | **Central**  N = 2,162a | **East**  N = 3,874a | **North**  N = 1,417a | **Northeast**  N = 924a | **Northwest**  N = 925a | **South**  N = 702a | **Southwest**  N = 2,259a |
| --- | --- | --- | --- | --- | --- | --- | --- | --- | --- |
| **Diabetes** | 11,887 |  |  |  |  |  |  |  |  |
| *no* |  | 10,976 (92.3%) | 1,931 (92.5%) | 3,441 (91.7%) | 1,256 (91.1%) | 826 (92.0%) | 847 (94.1%) | 627 (93.3%) | 2,048 (93.2%) |
| *yes* |  | 911 (7.7%) | 157 (7.5%) | 312 (8.3%) | 123 (8.9%) | 72 (8.0%) | 53 (5.9%) | 45 (6.7%) | 149 (6.8%) |
| **Hypertension** | 11,233 |  |  |  |  |  |  |  |  |
| *no* |  | 8,222 (73.2%) | 1,437 (72.8%) | 2,629 (73.8%) | 962 (74.5%) | 591 (69.7%) | 629 (74.9%) | 452 (70.1%) | 1,522 (73.3%) |
| *yes* |  | 3,011 (26.8%) | 536 (27.2%) | 931 (26.2%) | 329 (25.5%) | 257 (30.3%) | 211 (25.1%) | 193 (29.9%) | 554 (26.7%) |
| **Dyslipidemia** | 11,668 |  |  |  |  |  |  |  |  |
| *no* |  | 10,093 (86.5%) | 1,773 (86.1%) | 3,222 (87.4%) | 1,148 (85.8%) | 748 (84.0%) | 744 (85.5%) | 567 (84.4%) | 1,891 (87.9%) |
| *yes* |  | 1,575 (13.5%) | 286 (13.9%) | 465 (12.6%) | 190 (14.2%) | 143 (16.0%) | 126 (14.5%) | 105 (15.6%) | 260 (12.1%) |
| aContinuous variables: Mean (SD); Categorical variables: n (%) | | | | | | | | | |

**Supplementary Table 2.** **Demographic characteristics of different geographic regions at baseline (wave 2013)**

| **Variable** | **N** | **Overall** N = 8,051a | **Central**  N = 1,489a | **East**  N = 2,378a | **North**  N = 965a | **Northeast**  N = 546a | **Northwest**  N = 655a | **South**  N = 475a | **Southwest**  N = 1,543a |
| --- | --- | --- | --- | --- | --- | --- | --- | --- | --- |
| **Age group** | 8,051 |  |  |  |  |  |  |  |  |
| *45-65* |  | 5,316 (66.0%) | 977 (65.6%) | 1,520 (63.9%) | 718 (74.4%) | 382 (70.0%) | 436 (66.6%) | 316 (66.5%) | 967 (62.7%) |
| *≥65* |  | 2,735 (34.0%) | 512 (34.4%) | 858 (36.1%) | 247 (25.6%) | 164 (30.0%) | 219 (33.4%) | 159 (33.5%) | 576 (37.3%) |
| **Sex** | 8,051 |  |  |  |  |  |  |  |  |
| *Female* |  | 4,259 (52.9%) | 808 (54.3%) | 1,262 (53.1%) | 508 (52.6%) | 289 (52.9%) | 351 (53.6%) | 251 (52.8%) | 790 (51.2%) |
| *Male* |  | 3,792 (47.1%) | 681 (45.7%) | 1,116 (46.9%) | 457 (47.4%) | 257 (47.1%) | 304 (46.4%) | 224 (47.2%) | 753 (48.8%) |

**Supplementary Table 2** (*continued*)

| **Variable** | **N** | **Overall** N = 8,051a | **Central**  N = 1,489a | **East**  N = 2,378a | **North**  N = 965a | **Northeast**  N = 546a | **Northwest**  N = 655a | **South**  N = 475a | **Southwest**  N = 1,543a |
| --- | --- | --- | --- | --- | --- | --- | --- | --- | --- |
| **Education** | 8,051 |  |  |  |  |  |  |  |  |
| *Under upper secondary* |  | 7,267 (90.3%) | 1,337 (89.8%) | 2,162 (90.9%) | 800 (82.9%) | 459 (84.1%) | 589 (89.9%) | 425 (89.5%) | 1,495 (96.9%) |
| *Upper secondary* |  | 680 (8.4%) | 130 (8.7%) | 183 (7.7%) | 147 (15.2%) | 78 (14.3%) | 55 (8.4%) | 47 (9.9%) | 40 (2.6%) |
| *Tertiary* |  | 104 (1.3%) | 22 (1.5%) | 33 (1.4%) | 18 (1.9%) | 9 (1.6%) | 11 (1.7%) | 3 (0.6%) | 8 (0.5%) |
| **Smoking** | 6,062 |  |  |  |  |  |  |  |  |
| *Never* |  | 4,573 (75.4%) | 883 (74.8%) | 1,383 (80.5%) | 506 (71.2%) | 286 (71.3%) | 374 (72.2%) | 265 (75.3%) | 876 (74.2%) |
| *Former, now quit* |  | 529 (8.7%) | 116 (9.8%) | 125 (7.3%) | 79 (11.1%) | 37 (9.2%) | 46 (8.9%) | 31 (8.8%) | 95 (8.1%) |
| *Ever smoke, don't known whether smoke now* |  | 0 (0.0%) | 0 (0.0%) | 0 (0.0%) | 0 (0.0%) | 0 (0.0%) | 0 (0.0%) | 0 (0.0%) | 0 (0.0%) |
| *Still smoke* |  | 960 (15.8%) | 182 (15.4%) | 211 (12.3%) | 126 (17.7%) | 78 (19.5%) | 98 (18.9%) | 56 (15.9%) | 209 (17.7%) |

**Supplementary Table 2** (*continued*)

| **Variable** | **N** | **Overall** N = 8,051a | **Central**  N = 1,489a | **East**  N = 2,378a | **North**  N = 965a | **Northeast**  N = 546a | **Northwest**  N = 655a | **South**  N = 475a | **Southwest**  N = 1,543a |
| --- | --- | --- | --- | --- | --- | --- | --- | --- | --- |
| **Drinking** | 8,027 |  |  |  |  |  |  |  |  |
| *no drinking last year* |  | 5,387 (67.1%) | 985 (66.2%) | 1,576 (66.5%) | 656 (68.0%) | 351 (64.3%) | 489 (74.9%) | 353 (74.3%) | 977 (63.9%) |
| *drink <1 month last year* |  | 598 (7.4%) | 134 (9.0%) | 163 (6.9%) | 73 (7.6%) | 28 (5.1%) | 62 (9.5%) | 39 (8.2%) | 99 (6.5%) |
| *drink >1 month last year* |  | 2,042 (25.4%) | 368 (24.7%) | 632 (26.7%) | 236 (24.5%) | 167 (30.6%) | 102 (15.6%) | 83 (17.5%) | 454 (29.7%) |
| **Annual income** | 8,051 |  |  |  |  |  |  |  |  |
| *Q1* |  | 1,869 (23.2%) | 140 (9.4%) | 471 (19.8%) | 64 (6.6%) | 30 (5.5%) | 149 (22.7%) | 20 (4.2%) | 995 (64.5%) |
| *Q2* |  | 1,949 (24.2%) | 0 (0.0%) | 585 (24.6%) | 631 (65.4%) | 27 (4.9%) | 226 (34.5%) | 0 (0.0%) | 480 (31.1%) |
| *Q3* |  | 1,873 (23.3%) | 0 (0.0%) | 659 (27.7%) | 270 (28.0%) | 489 (89.6%) | 0 (0.0%) | 455 (95.8%) | 0 (0.0%) |
| *Q4* |  | 2,360 (29.3%) | 1,349 (90.6%) | 663 (27.9%) | 0 (0.0%) | 0 (0.0%) | 280 (42.7%) | 0 (0.0%) | 68 (4.4%) |

**Supplementary Table 2** (*continued*)

| **Variable** | **N** | **Overall** N = 8,051a | **Central**  N = 1,489a | **East**  N = 2,378a | **North**  N = 965a | **Northeast**  N = 546a | **Northwest**  N = 655a | **South**  N = 475a | **Southwest**  N = 1,543a |
| --- | --- | --- | --- | --- | --- | --- | --- | --- | --- |
| **Physical Inactivity** | 8,051 |  |  |  |  |  |  |  |  |
| *no* |  | 7,935 (98.6%) | 1,472 (98.9%) | 2,334 (98.1%) | 949 (98.3%) | 538 (98.5%) | 644 (98.3%) | 471 (99.2%) | 1,527 (99.0%) |
| *yes* |  | 116 (1.4%) | 17 (1.1%) | 44 (1.9%) | 16 (1.7%) | 8 (1.5%) | 11 (1.7%) | 4 (0.8%) | 16 (1.0%) |
| **Residence place** | 8,051 |  |  |  |  |  |  |  |  |
| *rural* |  | 5,402 (67.1%) | 990 (66.5%) | 1,566 (65.9%) | 701 (72.6%) | 356 (65.2%) | 499 (76.2%) | 215 (45.3%) | 1,075 (69.7%) |
| *urban* |  | 2,649 (32.9%) | 499 (33.5%) | 812 (34.1%) | 264 (27.4%) | 190 (34.8%) | 156 (23.8%) | 260 (54.7%) | 468 (30.3%) |
| **Diabetes** | 7,804 |  |  |  |  |  |  |  |  |
| *no* |  | 7,169 (91.9%) | 1,326 (91.7%) | 2,122 (92.1%) | 841 (91.3%) | 474 (90.1%) | 590 (92.9%) | 436 (93.8%) | 1,380 (91.6%) |
| *yes* |  | 635 (8.1%) | 120 (8.3%) | 182 (7.9%) | 80 (8.7%) | 52 (9.9%) | 45 (7.1%) | 29 (6.2%) | 127 (8.4%) |

**Supplementary Table 2** (*continued*)

| **Variable** | **N** | **Overall** N = 8,051a | **Central**  N = 1,489a | **East**  N = 2,378a | **North**  N = 965a | **Northeast**  N = 546a | **Northwest**  N = 655a | **South**  N = 475a | **Southwest**  N = 1,543a |
| --- | --- | --- | --- | --- | --- | --- | --- | --- | --- |
| **Hypertension** | 7,327 |  |  |  |  |  |  |  |  |
| *no* |  | 5,348 (73.0%) | 989 (72.6%) | 1,577 (72.4%) | 644 (74.9%) | 355 (74.0%) | 429 (71.7%) | 311 (73.2%) | 1,043 (73.3%) |
| *yes* |  | 1,979 (27.0%) | 374 (27.4%) | 602 (27.6%) | 216 (25.1%) | 125 (26.0%) | 169 (28.3%) | 114 (26.8%) | 379 (26.7%) |
| **Dyslipidemia** | 7,618 |  |  |  |  |  |  |  |  |
| *no* |  | 6,570 (86.2%) | 1,221 (86.4%) | 1,960 (86.4%) | 743 (84.5%) | 427 (83.4%) | 542 (87.8%) | 391 (84.3%) | 1,286 (87.8%) |
| *yes* |  | 1,048 (13.8%) | 192 (13.6%) | 308 (13.6%) | 136 (15.5%) | 85 (16.6%) | 75 (12.2%) | 73 (15.7%) | 179 (12.2%) |
| **Sarcopenia** | 8,051 |  |  |  |  |  |  |  |  |
| *no* |  | 6,454 (80.2%) | 1,201 (80.7%) | 1,927 (81.0%) | 862 (89.3%) | 463 (84.8%) | 531 (81.1%) | 347 (73.1%) | 1,123 (72.8%) |
| *yes* |  | 1,597 (19.8%) | 288 (19.3%) | 451 (19.0%) | 103 (10.7%) | 83 (15.2%) | 124 (18.9%) | 128 (26.9%) | 420 (27.2%) |

aContinuous variables: Mean (SD); Categorical variables: n (%)

**Supplementary Table 3.** **Demographic characteristics of different geographic regions at baseline (wave 2015)**

| **Variable** | **N** | **Overall** N = 8,626a | **Central**  N = 1,539a | **East**  N = 2,806a | **North**  N = 988a | **Northeast**  N = 628a | **Northwest**  N = 637a | **South**  N = 416a | **Southwest**  N = 1,612a |
| --- | --- | --- | --- | --- | --- | --- | --- | --- | --- |
| **Age group** | 8,626 |  |  |  |  |  |  |  |  |
| *45-65* |  | 5,185 (60.1%) | 931 (60.5%) | 1,636 (58.3%) | 670 (67.8%) | 410 (65.3%) | 374 (58.7%) | 261 (62.7%) | 903 (56.0%) |
| *≥65* |  | 3,441 (39.9%) | 608 (39.5%) | 1,170 (41.7%) | 318 (32.2%) | 218 (34.7%) | 263 (41.3%) | 155 (37.3%) | 709 (44.0%) |
| **Sex** | 8,626 |  |  |  |  |  |  |  |  |
| *Female* |  | 4,593 (53.2%) | 829 (53.9%) | 1,510 (53.8%) | 515 (52.1%) | 344 (54.8%) | 337 (52.9%) | 230 (55.3%) | 828 (51.4%) |
| *Male* |  | 4,033 (46.8%) | 710 (46.1%) | 1,296 (46.2%) | 473 (47.9%) | 284 (45.2%) | 300 (47.1%) | 186 (44.7%) | 784 (48.6%) |

**Supplementary Table 3** (*continued*)

| **Variable** | **N** | **Overall** N = 8,626a | **Central**  N = 1,539a | **East**  N = 2,806a | **North**  N = 988a | **Northeast**  N = 628a | **Northwest**  N = 637a | **South**  N = 416a | **Southwest**  N = 1,612a |
| --- | --- | --- | --- | --- | --- | --- | --- | --- | --- |
| **Education** | 8,626 |  |  |  |  |  |  |  |  |
| *Under upper secondary* |  | 7,829 (90.8%) | 1,379 (89.6%) | 2,577 (91.8%) | 822 (83.2%) | 530 (84.4%) | 574 (90.1%) | 378 (90.9%) | 1,569 (97.3%) |
| *Upper secondary* |  | 697 (8.1%) | 139 (9.0%) | 198 (7.1%) | 150 (15.2%) | 86 (13.7%) | 51 (8.0%) | 35 (8.4%) | 38 (2.4%) |
| *Tertiary* |  | 100 (1.2%) | 21 (1.4%) | 31 (1.1%) | 16 (1.6%) | 12 (1.9%) | 12 (1.9%) | 3 (0.7%) | 5 (0.3%) |
| **Smoking** | 8,619 |  |  |  |  |  |  |  |  |
| *Never* |  | 5,017 (58.2%) | 944 (61.5%) | 1,680 (59.9%) | 522 (52.9%) | 326 (51.9%) | 366 (57.5%) | 240 (57.7%) | 939 (58.3%) |
| *Former, now quit* |  | 1,222 (14.2%) | 202 (13.2%) | 420 (15.0%) | 174 (17.6%) | 88 (14.0%) | 89 (14.0%) | 48 (11.5%) | 201 (12.5%) |
| *Ever smoke, don't known whether smoke now* |  | 0 (0.0%) | 0 (0.0%) | 0 (0.0%) | 0 (0.0%) | 0 (0.0%) | 0 (0.0%) | 0 (0.0%) | 0 (0.0%) |
| *Still smoke* |  | 2,380 (27.6%) | 389 (25.3%) | 705 (25.1%) | 290 (29.4%) | 214 (34.1%) | 182 (28.6%) | 128 (30.8%) | 472 (29.3%) |

**Supplementary Table 3** (*continued*)

| **Variable** | **N** | **Overall** N = 8,626a | **Central**  N = 1,539a | **East**  N = 2,806a | **North**  N = 988a | **Northeast**  N = 628a | **Northwest**  N = 637a | **South**  N = 416a | **Southwest**  N = 1,612a |
| --- | --- | --- | --- | --- | --- | --- | --- | --- | --- |
| **Drinking** | 8,621 |  |  |  |  |  |  |  |  |
| *no drinking last year* |  | 5,780 (67.0%) | 1,059 (68.9%) | 1,860 (66.3%) | 715 (72.4%) | 391 (62.3%) | 458 (71.9%) | 279 (67.2%) | 1,018 (63.2%) |
| *drink <1 month last year* |  | 681 (7.9%) | 122 (7.9%) | 175 (6.2%) | 72 (7.3%) | 55 (8.8%) | 85 (13.3%) | 52 (12.5%) | 120 (7.5%) |
| *drink >1 month last year* |  | 2,160 (25.1%) | 356 (23.2%) | 771 (27.5%) | 201 (20.3%) | 182 (29.0%) | 94 (14.8%) | 84 (20.2%) | 472 (29.3%) |
| **Annual income** | 8,626 |  |  |  |  |  |  |  |  |
| *Q1* |  | 2,654 (30.8%) | 232 (15.1%) | 797 (28.4%) | 156 (15.8%) | 81 (12.9%) | 185 (29.0%) | 102 (24.5%) | 1,101 (68.3%) |
| *Q2* |  | 1,931 (22.4%) | 0 (0.0%) | 687 (24.5%) | 594 (60.1%) | 26 (4.1%) | 205 (32.2%) | 0 (0.0%) | 419 (26.0%) |
| *Q3* |  | 1,687 (19.6%) | 0 (0.0%) | 614 (21.9%) | 238 (24.1%) | 521 (83.0%) | 0 (0.0%) | 314 (75.5%) | 0 (0.0%) |
| *Q4* |  | 2,354 (27.3%) | 1,307 (84.9%) | 708 (25.2%) | 0 (0.0%) | 0 (0.0%) | 247 (38.8%) | 0 (0.0%) | 92 (5.7%) |

**Supplementary Table 3** (*continued*)

| **Variable** | **N** | **Overall** N = 8,626a | **Central**  N = 1,539a | **East**  N = 2,806a | **North**  N = 988a | **Northeast**  N = 628a | **Northwest**  N = 637a | **South**  N = 416a | **Southwest**  N = 1,612a |
| --- | --- | --- | --- | --- | --- | --- | --- | --- | --- |
| **Physical Inactivity** | 8,626 |  |  |  |  |  |  |  |  |
| *no* |  | 8,496 (98.5%) | 1,519 (98.7%) | 2,755 (98.2%) | 968 (98.0%) | 623 (99.2%) | 632 (99.2%) | 413 (99.3%) | 1,586 (98.4%) |
| *yes* |  | 130 (1.5%) | 20 (1.3%) | 51 (1.8%) | 20 (2.0%) | 5 (0.8%) | 5 (0.8%) | 3 (0.7%) | 26 (1.6%) |
| **Residence place** | 8,626 |  |  |  |  |  |  |  |  |
| *rural* |  | 5,809 (67.3%) | 1,043 (67.8%) | 1,871 (66.7%) | 738 (74.7%) | 387 (61.6%) | 494 (77.6%) | 189 (45.4%) | 1,087 (67.4%) |
| *urban* |  | 2,817 (32.7%) | 496 (32.2%) | 935 (33.3%) | 250 (25.3%) | 241 (38.4%) | 143 (22.4%) | 227 (54.6%) | 525 (32.6%) |
| **Diabetes** | 8,320 |  |  |  |  |  |  |  |  |
| *no* |  | 7,643 (91.9%) | 1,372 (91.8%) | 2,471 (91.4%) | 877 (92.9%) | 555 (91.4%) | 572 (92.1%) | 358 (89.7%) | 1,438 (92.7%) |
| *yes* |  | 677 (8.1%) | 122 (8.2%) | 233 (8.6%) | 67 (7.1%) | 52 (8.6%) | 49 (7.9%) | 41 (10.3%) | 113 (7.3%) |

**Supplementary Table 3** (*continued*)

| **Variable** | **N** | **Overall** N = 8,626a | **Central**  N = 1,539a | **East**  N = 2,806a | **North**  N = 988a | **Northeast**  N = 628a | **Northwest**  N = 637a | **South**  N = 416a | **Southwest**  N = 1,612a |
| --- | --- | --- | --- | --- | --- | --- | --- | --- | --- |
| **Hypertension** | 7,858 |  |  |  |  |  |  |  |  |
| *no* |  | 5,708 (72.6%) | 1,020 (72.8%) | 1,867 (72.9%) | 649 (72.5%) | 446 (76.4%) | 410 (70.1%) | 277 (74.3%) | 1,039 (71.3%) |
| *yes* |  | 2,150 (27.4%) | 382 (27.2%) | 695 (27.1%) | 246 (27.5%) | 138 (23.6%) | 175 (29.9%) | 96 (25.7%) | 418 (28.7%) |
| **Dyslipidemia** | 8,134 |  |  |  |  |  |  |  |  |
| *no* |  | 6,991 (85.9%) | 1,254 (85.7%) | 2,286 (86.6%) | 768 (83.9%) | 495 (84.0%) | 520 (85.2%) | 332 (86.0%) | 1,336 (87.3%) |
| *yes* |  | 1,143 (14.1%) | 209 (14.3%) | 354 (13.4%) | 147 (16.1%) | 94 (16.0%) | 90 (14.8%) | 54 (14.0%) | 195 (12.7%) |
| **Sarcopenia** | 8,626 |  |  |  |  |  |  |  |  |
| *no* |  | 6,723 (77.9%) | 1,191 (77.4%) | 2,223 (79.2%) | 873 (88.4%) | 529 (84.2%) | 500 (78.5%) | 302 (72.6%) | 1,105 (68.5%) |
| *yes* |  | 1,903 (22.1%) | 348 (22.6%) | 583 (20.8%) | 115 (11.6%) | 99 (15.8%) | 137 (21.5%) | 114 (27.4%) | 507 (31.5%) |

aContinuous variables: Mean (SD); Categorical variables: n (%)

**Supplementary Table 4. Odds ratios of cardiovascular disease (CVD) and chronic kidney disease (CKD) by baseline sarcopenia**

| **Region** | **CVD** | | | | | **CKD** | | | | |
| --- | --- | --- | --- | --- | --- | --- | --- | --- | --- | --- |
| **Non-sarcopenia** | | **Sarcopenia** | | ***P*** | **Non-sarcopenia** | | **Sarcopenia** | | ***P*** |
|  | **OR (95% confidence interval)** | | |  | **OR (95% confidence interval)** | | |
| Totala |  | 1.00 (ref) |  | 1.11 (0.88–1.39) | 0.40 |  | 1.00 (ref) |  | 1.28 (0.96–1.71) | 0.09 |
| Central |  |  | 0.83 (0.47–1.47) | 0.51 |  |  | 0.99 (0.45–2.20) | 0.99 |
| East |  |  | 1.30 (0.86–1.98) | 0.21 |  |  | 1.36 (0.83–2.23) | 0.23 |
| North |  |  | 0.92 (0.37–2.27) | 0.85 |  |  | 2.90 (0.95–8.82) | 0.06 |
| Northeast |  |  | 0.71 (0.16–3.12) | 0.63 |  |  | 0.45 (0.09–2.31) | 0.31 |
| Northwest |  |  | 1.19 (0.38–3.65) | 0.73 |  |  | 1.68 (0.47–6.01) | 0.38 |
| South |  |  | 0.95 (0.24–3.71) | 0.93 |  |  | 1.66 (0.51–5.37) | 0.37 |
| Southwest |  |  | 1.58 (1.08–2.32) | ***0.02*** |  |  | 1.76 (1.17–2.63) | ***<0.01*** |

aAfter exclusion of participants with missing regional information, the final analytic sample comprised 7,428 and 7972 individuals for CVD and CKD respectively. Odds ratios were estimated using survey-weighted logistic regression with non-sarcopenia as the reference group.

**
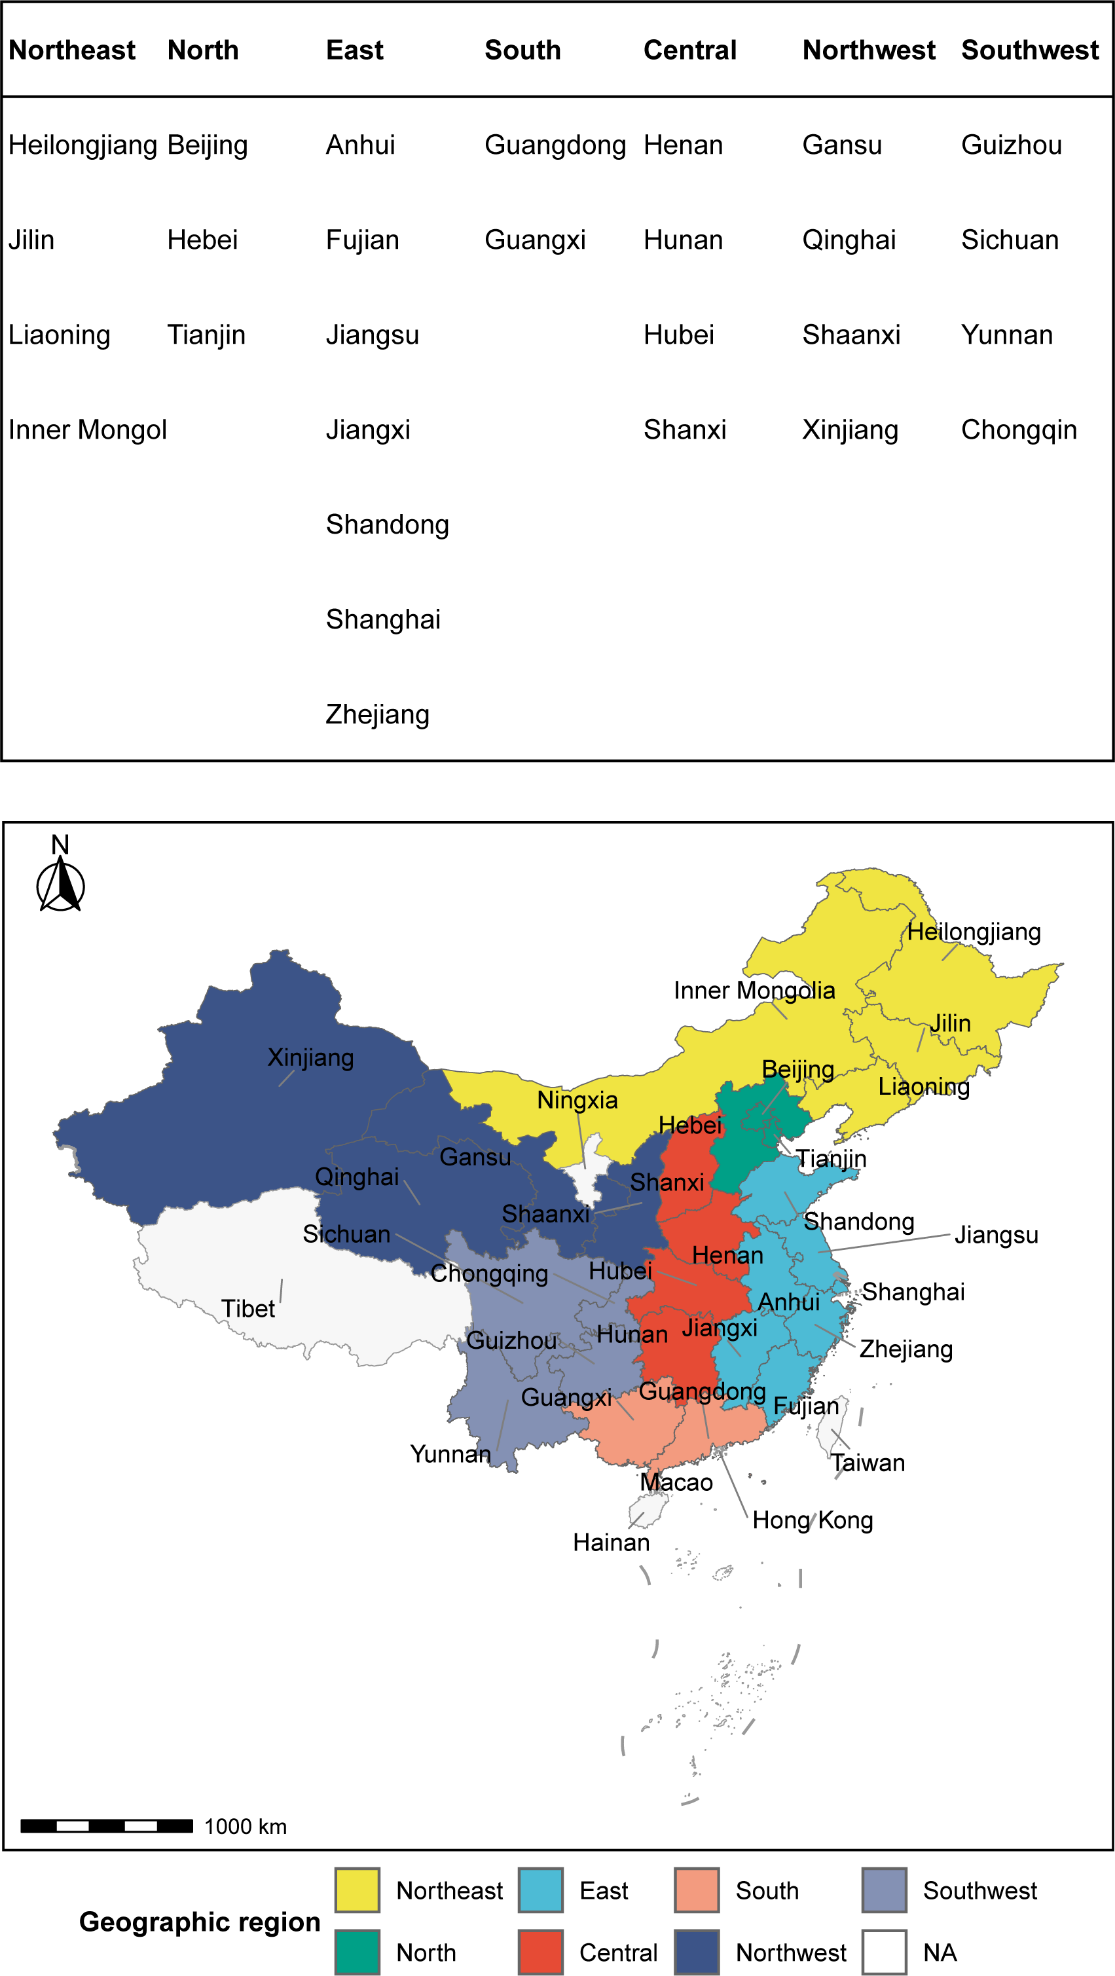
**

**Supplementary Figure 1.** **Geographical division of provinces**

**
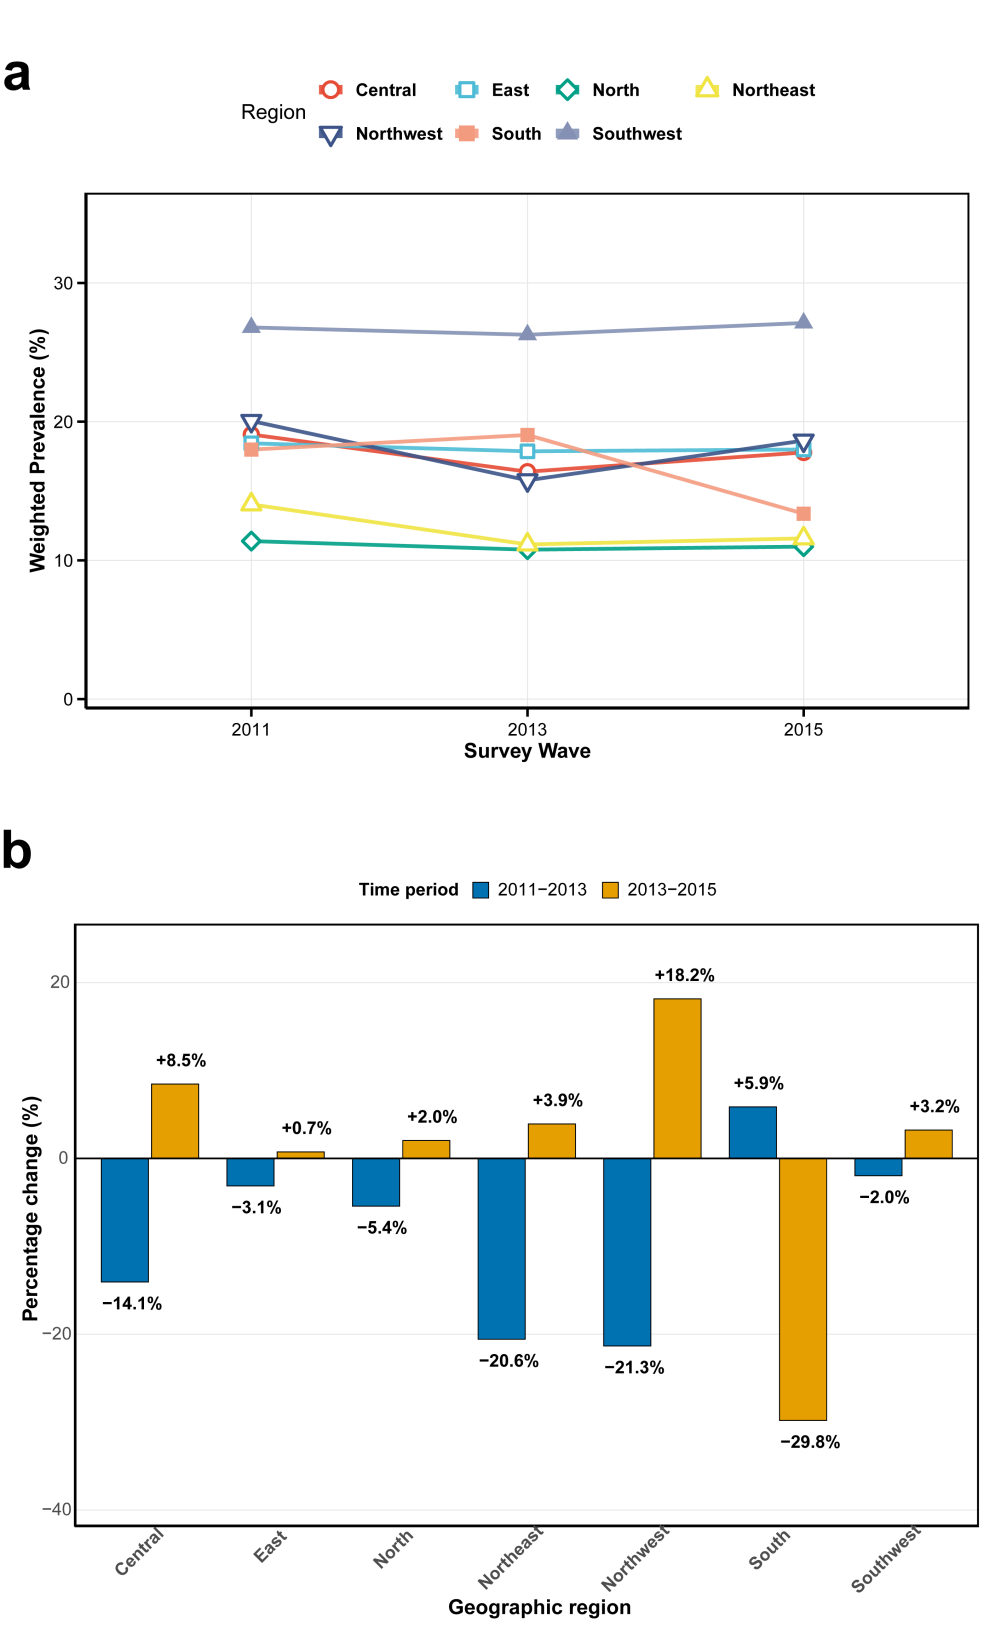
**

**Supplementary figure 2. Age-standardized prevalence trends of sarcopenia in three survey waves (2011, 2013, 2015) at seven regions.** (a) Line graph showing incidence rates across three waves; (b) Bar graph displaying the percentage changes between two consecutive waves.

**
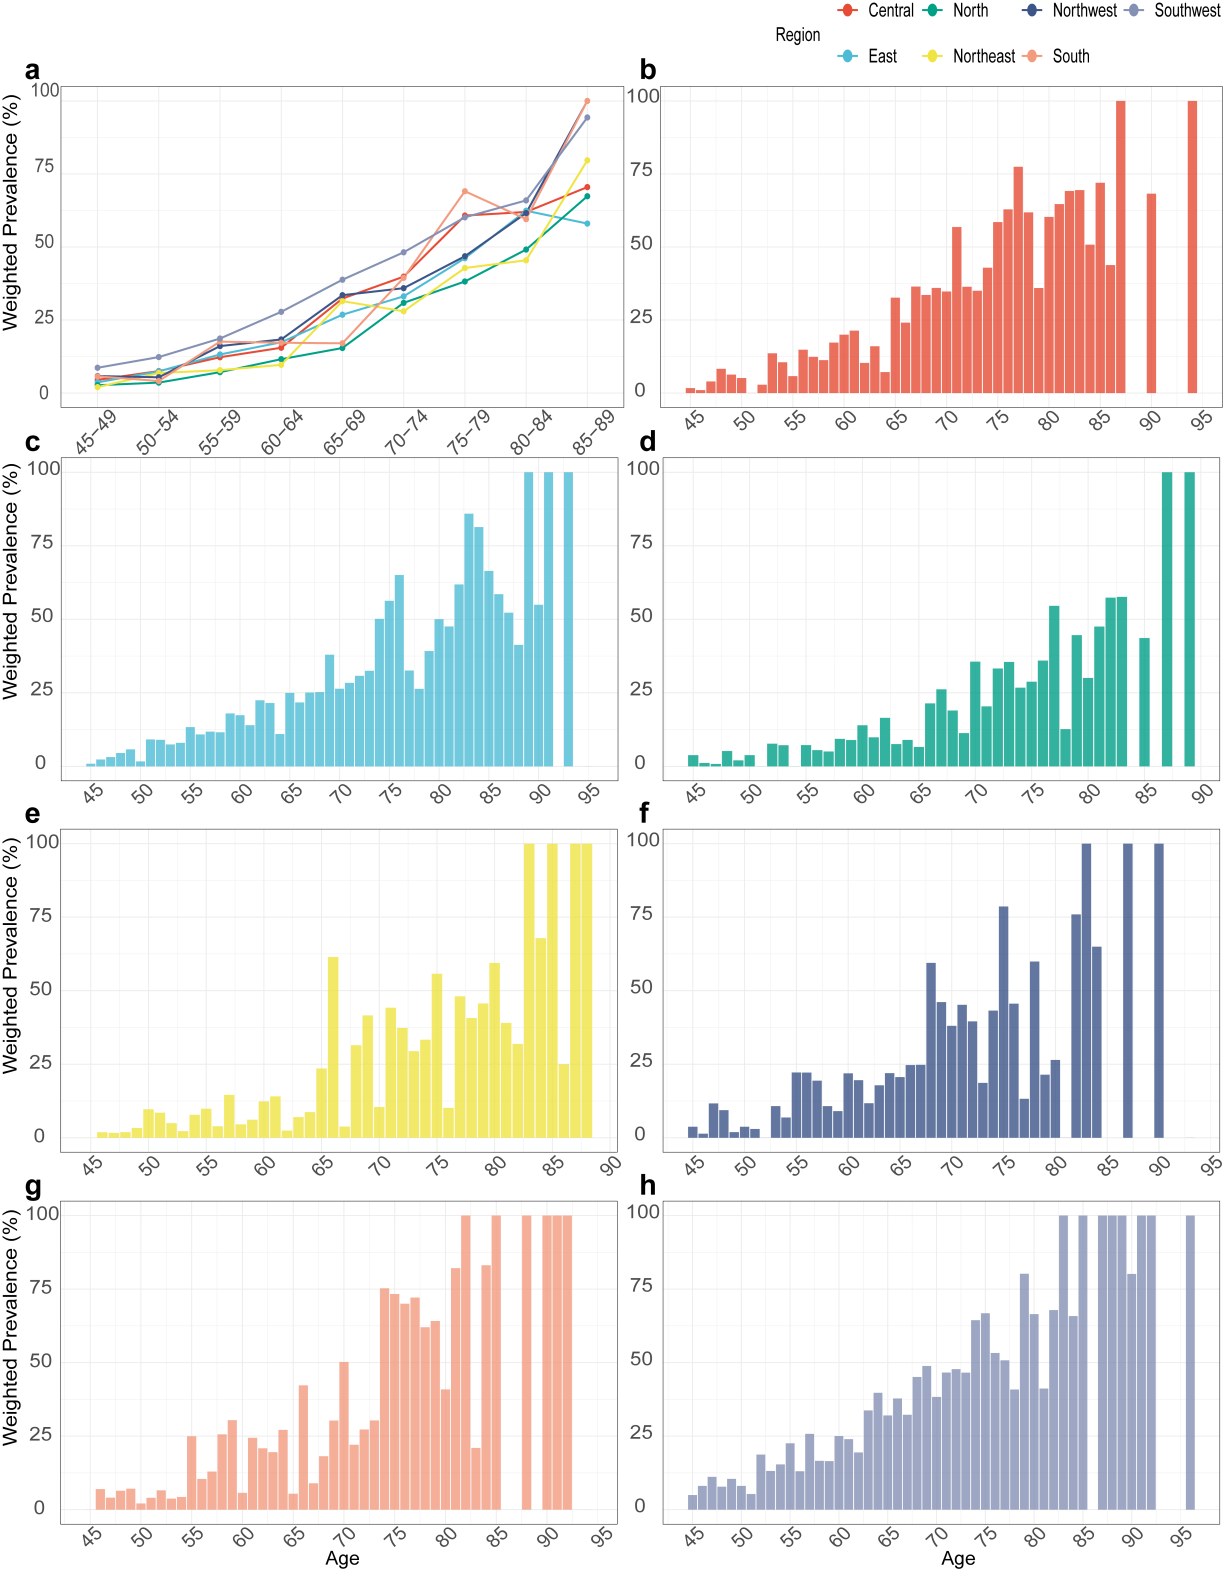
**

**Supplementary figure 3.** **Weighted prevalence trend of sarcopenia by ages and regions in 2011.** (a) Line graph showing trends of incidence rates across different age groups in wave 2011 stratified by region; Continuous bar chart showing incidence rates of (b) Central, (c) East, (d) North, (e) Northeast, (f) Northwest, (g) South, and (h) Southwest across different age groups.


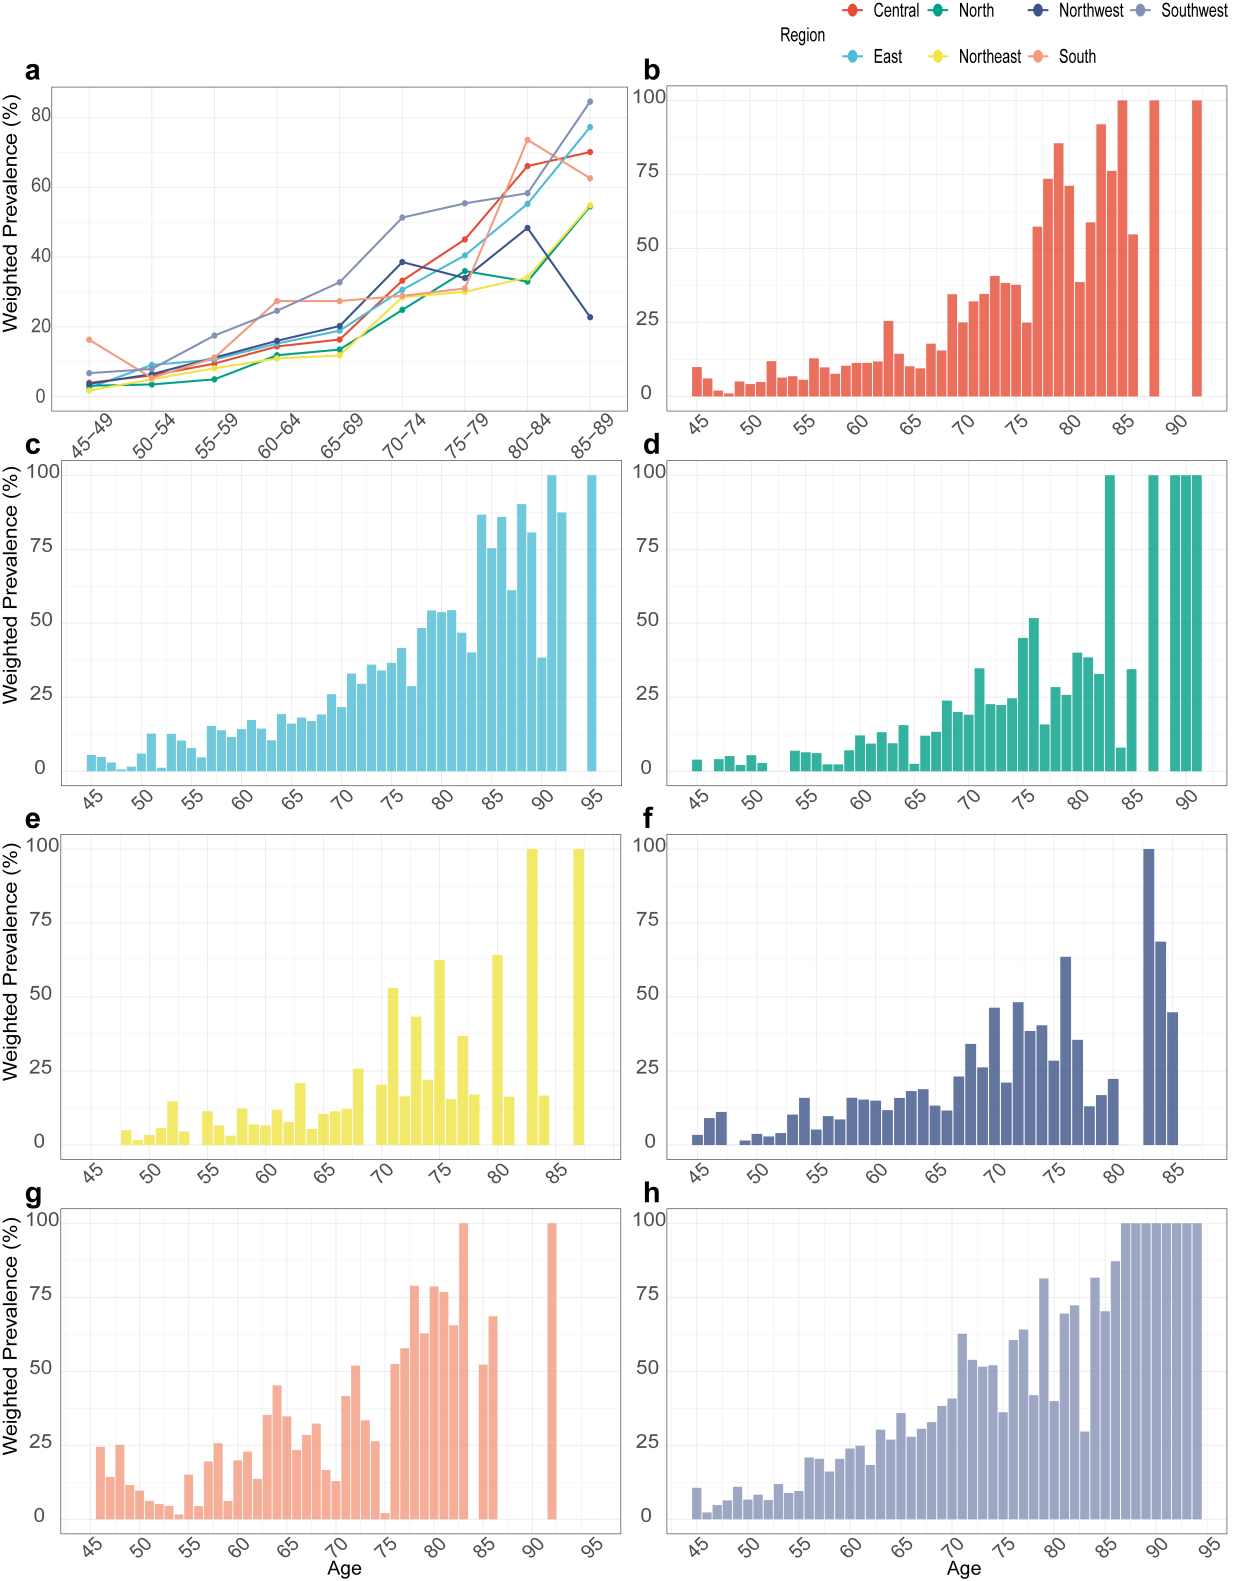


**Supplementary figure 4.** **Weighted prevalence trend of sarcopenia by ages and regions in 2013.** (a) Line graph showing trends of incidence rates across different age groups in wave 2013 stratified by region; Continuous bar chart showing incidence rates of (b) Central, (c) East, (d) North, (e) Northeast, (f) Northwest, (g) South, and (h) Southwest across different age groups.


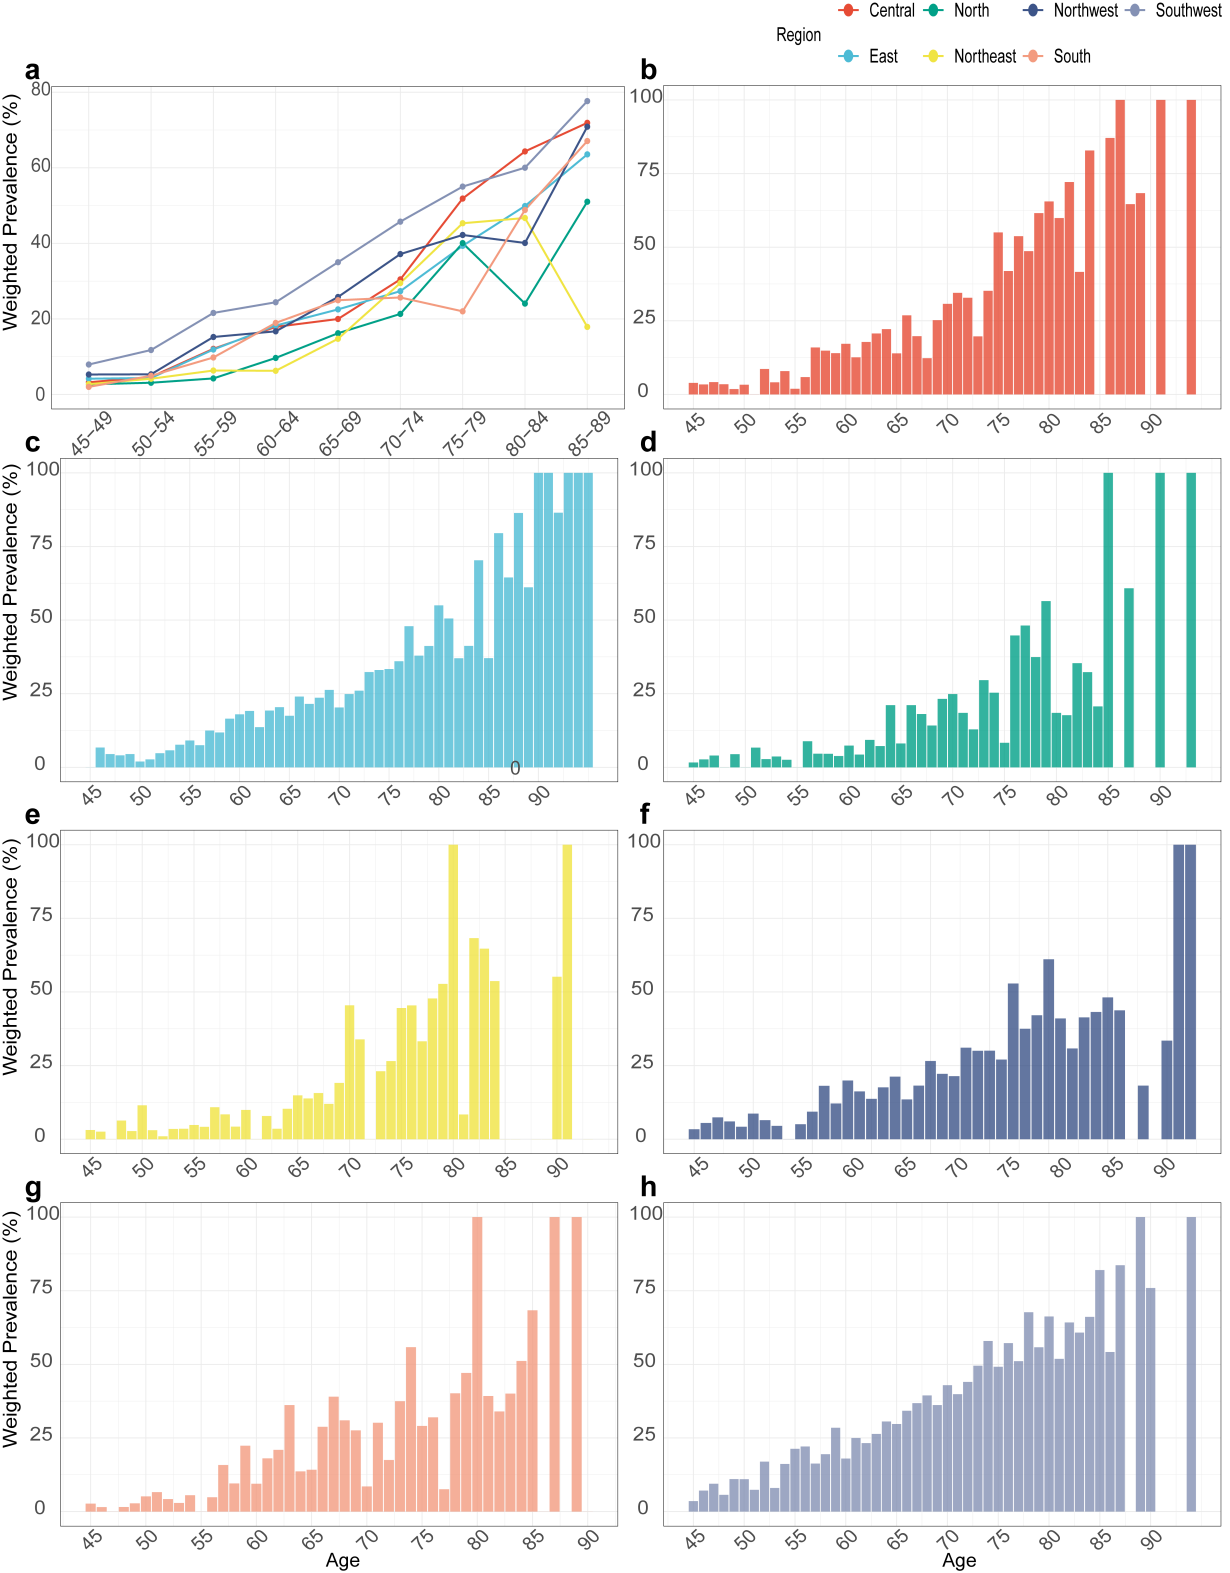


**Supplementary figure 5.** **Weighted prevalence trend of sarcopenia by ages and regions in 2015.** (a) Line graph showing trends of incidence rates across different age groups in wave 2015 stratified by region; Continuous bar chart showing incidence rates of (b) Central, (c) East, (d) North, (e) Northeast, (f) Northwest, (g) South, and (h) Southwest across different age groups.
